# Supplementary material for: Irreversible and reversible formation of a [2]rotaxane containing platinum(ii) complex with an N-alkyl bipyridinium ligand as the axis component
Source: Royal Society of Chemistry journal article supplement (doi:10.1039/b610087b), 2006-01-01
Supplement: b610087b.pdf [file b610087b.pdf]

Electronic Supplementary Information  
of  
Irreversible and Reversible Formation of [2]Rotaxane Containing Platinum(II)  
Complex with an *N*-Alkyl Bipyridinium Ligand as the Axis Component

Yuji Suzuki, Toshiaki Taira and Kohtaro Osakada\*

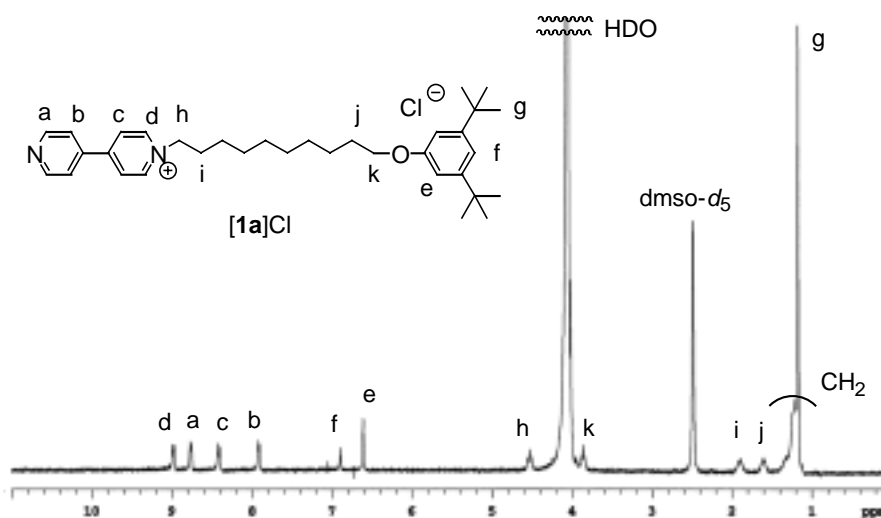

Figure S1. <sup>1</sup>H NMR spectrum of [1a]Cl in dmsO-d<sub>6</sub>/D<sub>2</sub>O (300 MHz).

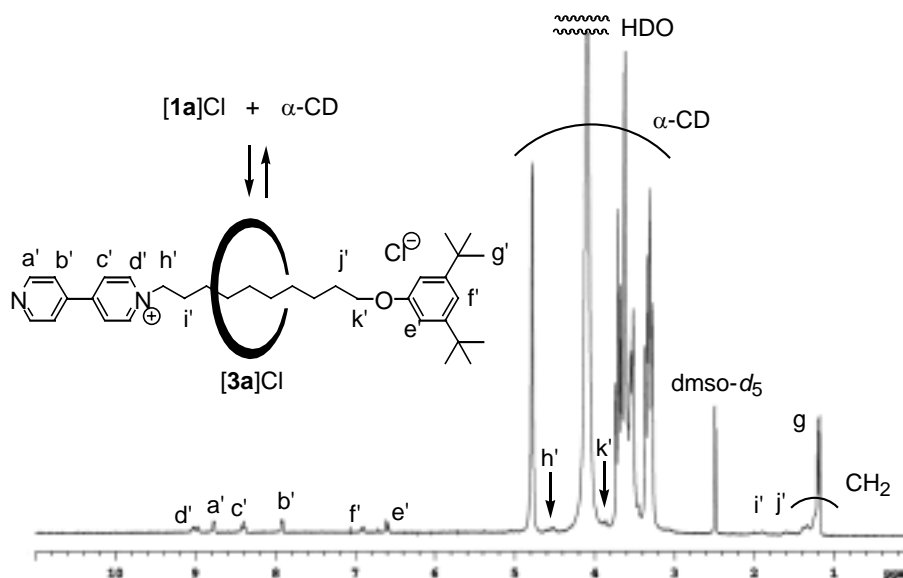

Figure S2. <sup>1</sup>H NMR spectrum of the mixture of [1a]Cl and  $\alpha$ -CD ([1a]Cl<sub>0</sub> = 2.8 mM, [ $\alpha$ -CD]<sub>0</sub> = 28 mM) in dmsO-d<sub>6</sub>/D<sub>2</sub>O (300 MHz).

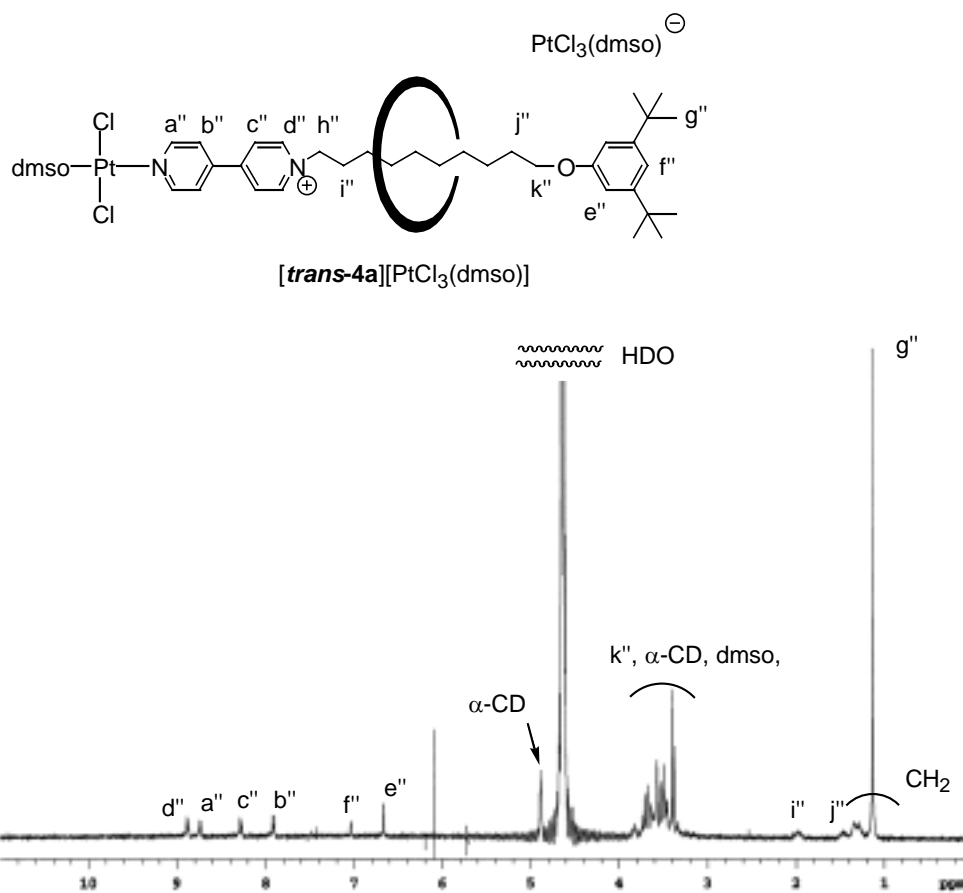

**Figure S3.**  $^1H$  NMR spectrum of  $[trans-4a][PtCl_3(dmsO)]$  in  $D_2O$  (300 MHz). The signal of h'' is probably overlapping with the signal of the solvent.
